# Supplementary material
Source: PubMed Central journal article supplement (PMC7158902)
Supplement: mmc1.pdf [file mmc1.pdf]

# THE LANCET

## Infectious Diseases

### **Supplementary appendix**

This appendix formed part of the original submission and has been peer reviewed. We post it as supplied by the authors.

Supplement to: Liu Y, Yan L-M, Wan L, et al. Viral dynamics in mild and severe cases of COVID-19. *Lancet Infect Dis* 2020; published online March 19. [https://doi.org/10.1016/S1473-3099\(20\)30232-2](https://doi.org/10.1016/S1473-3099(20)30232-2).

Appendix. Basic demographic data and initial clinical symptoms of the studied patients.

|                                                                      | <b>Mild</b>     | <b>Severe</b>                 |
|----------------------------------------------------------------------|-----------------|-------------------------------|
| Number                                                               | 46              | 30                            |
| Male:Female                                                          | 28:18           | 20:10                         |
| Age (Average $\pm$ SD)                                               | 43.6 $\pm$ 14.4 | 55.6 $\pm$ 15.1 <sup>¶</sup>  |
| Fever                                                                | 40 (86.9%)      | 23 (76.6%)                    |
| Cough                                                                | 22 (47.8%)      | 13 (43.3%)                    |
| Fatigue                                                              | 7 (15.2%)       | 6 (20%)                       |
| Chill                                                                | 6 (13.0%)       | 8 (26.7%)                     |
| Sore throat                                                          | 8 (17.4%)       | 2 (6.7%)                      |
| Dyspnea                                                              | 5 (10.9%)       | 4 (13.3%)                     |
| Headache /Dizziness                                                  | 5 (10.9%)       | 5 (16.7%)                     |
| Vomiting                                                             | 2 (4.3%)        | 0 (0%)                        |
| Diarrhea                                                             | 2 (4.3%)        | 0 (0%)                        |
| ICU treatment                                                        | 0 (0%)          | 23 (76.7%) <sup>#</sup>       |
| Viral load (Ct <sub>sample</sub> -Ct <sub>Ref</sub> ; Mean $\pm$ SD) | 4.44 $\pm$ 3.99 | -1.42 $\pm$ 3.62 <sup>*</sup> |

<sup>¶</sup> p<0.01, Mann-Whitney test

<sup>#</sup> p<0.00001, Fisher's exact test

<sup>\*</sup> p<0 .00001, Mann-Whitney test
